# Supplementary material for: Vitamin D Status and Gastric Cancer: A Cross-Sectional Study in Koreans
Source: MDPI journal article supplement (doi:10.3390/nu12072004), 2020-07-06
Supplement: s1 [file s1]

**Supplemental Table 1. Adjusted odds ratios and 95% confidence intervals of gastric cancer stratified by total 25(OH)D concentrations (current status)**

| Variables             | No. stomach cancer/No. participants | Model A             | Model B             |
|-----------------------|-------------------------------------|---------------------|---------------------|
| Total 25(OH)D (ng/mL) |                                     |                     |                     |
| 5 ng/mL increased     | 72/33119                            | 0.974 (0.799–1.188) | 1.056 (0.856–1.304) |
| <12 (deficient)       | 7/5927                              | 1 (Reference)       | 1 (Reference)       |
| 12–19.99 (suboptimal) | 33/16620                            | 1.001 (0.335–2.991) | 0.979 (0.330–2.910) |
| ≥20 (sufficient)      | 32/10527                            | 1.041 (0.350–3.093) | 1.231 (0.411–3.574) |
| p trend               |                                     | 0.928               | 0.701               |

\*\*p<0.001, \*p<0.05, §p<0.1 compared with reference group (vitamin concentrations <12 nmol/L). Model A was adjusted for age, sex, body mass index. Model B: model A further adjusted for education, household income, smoking status, alcohol consumption, and dietary factors (intake of total energy, calcium, vitamin A).
